# Supplementary material for: Reduced graphene oxide-encaged submicron-silicon anode interfacially stabilized by Al2O3 nanoparticles for efficient lithium-ion batteries
Source: Royal Society of Chemistry journal article supplement (doi:10.1039/d4ra00751d), 2024-01-01
Supplement: d4ra00751d1.pdf [file d4ra00751d1.pdf]

*Supporting information*

**Reduced Graphene Oxides Encaged Submicron-silicon Anode  
Interfacially Stabilized by Al<sub>2</sub>O<sub>3</sub> Nanoparticles for Efficient Lithium-  
ion Batteries**

Xiangyu Tan <sup>1</sup>, Zhongqiang Zhao <sup>3</sup>, Zhimin Na <sup>4</sup>, Ran Zhuo <sup>5</sup>, Fangrong Zhou <sup>1</sup>, Dibo Wang <sup>5</sup>, Longchang Zhu<sup>1</sup>, Yi Li <sup>2</sup>, Shaocong Hou <sup>2,\*</sup> Xin Cai<sup>3,\*</sup>

<sup>1</sup> Power Science Research Institute of Yunnan Power Grid Co., Ltd, Kunming 650214, China

<sup>2</sup> School of Electrical Engineering and Automation, Wuhan University, Wuhan 430072, China

<sup>3</sup> College of Materials and Energy, South China Agricultural University, Guangzhou 510642, China

<sup>4</sup> Qujing Power Supply Bureau of Yunnan Power Grid Co., Ltd, Qujing 655099, China

<sup>5</sup> Electric Power Research Institute, China Southern Power Grid, Guangzhou 510623, China

*\*Corresponding author E-mail address:*

*sc.hou@whu.edu.cn (Shaocong Hou)*

*caixin2015@scau.edu.cn (Xin Cai)*

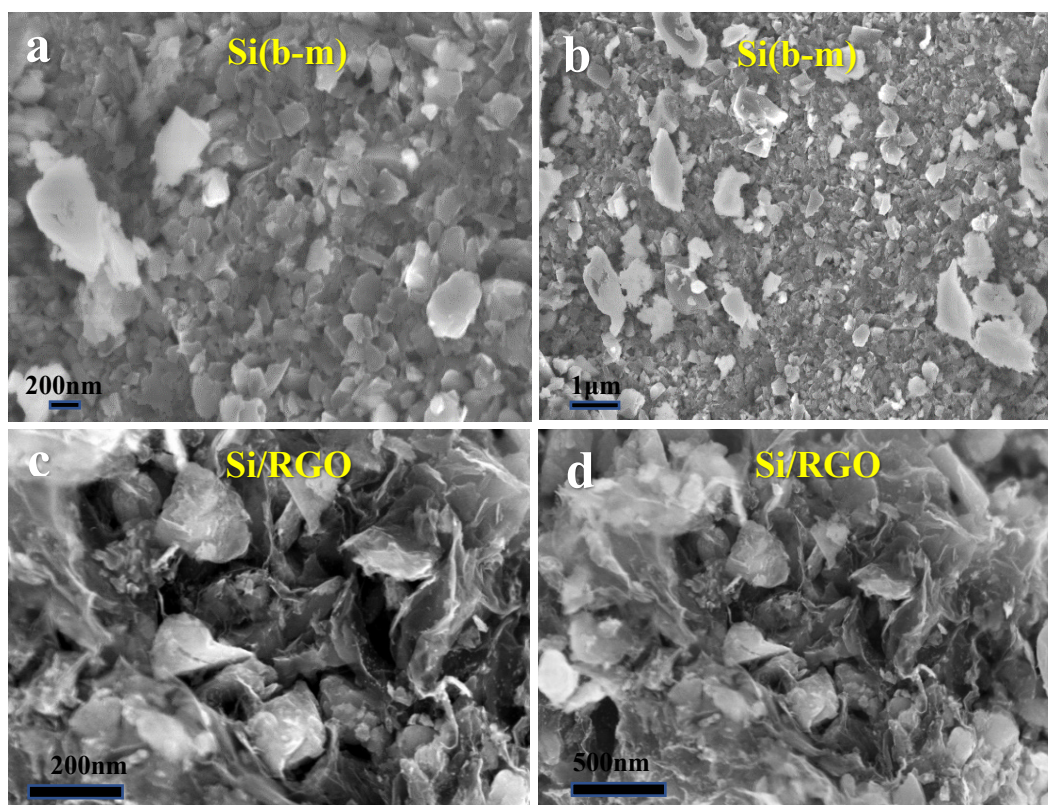

**Figure S1** SEM images of ball milled Si (a, b) and Si/RGO (c, d).

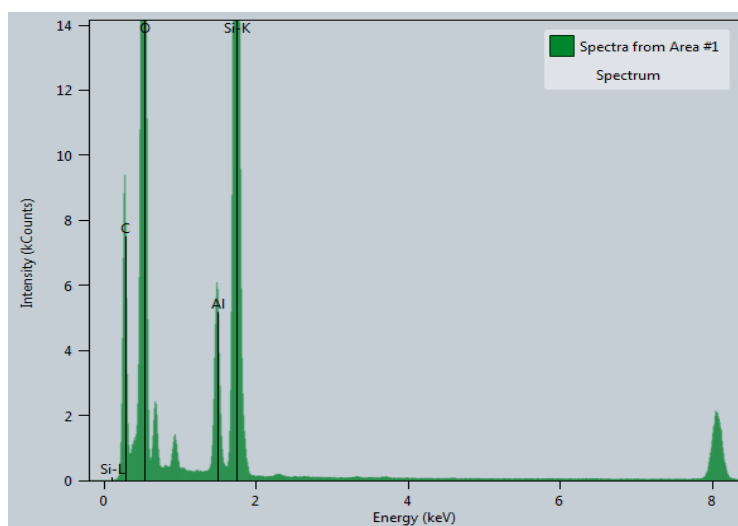

**Figure S2** Energy dispersion spectrum of Si/Al<sub>2</sub>O<sub>3</sub>/RGO.

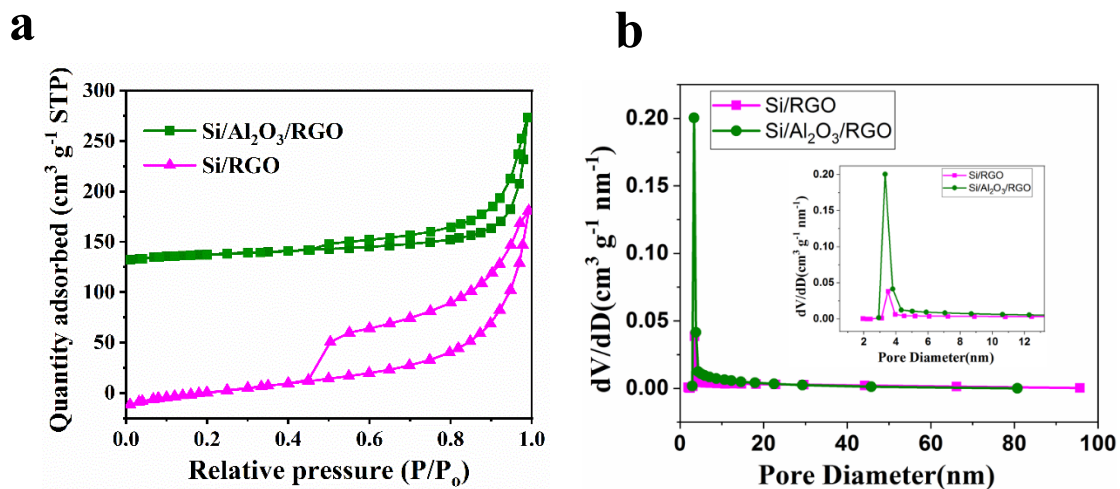

Figure S3 N<sub>2</sub> adsorption/desorption isotherms at 77 K (a) and the relevant BJH pore-size distribution of Si/RGO and Si/Al<sub>2</sub>O<sub>3</sub>/RGO composites.

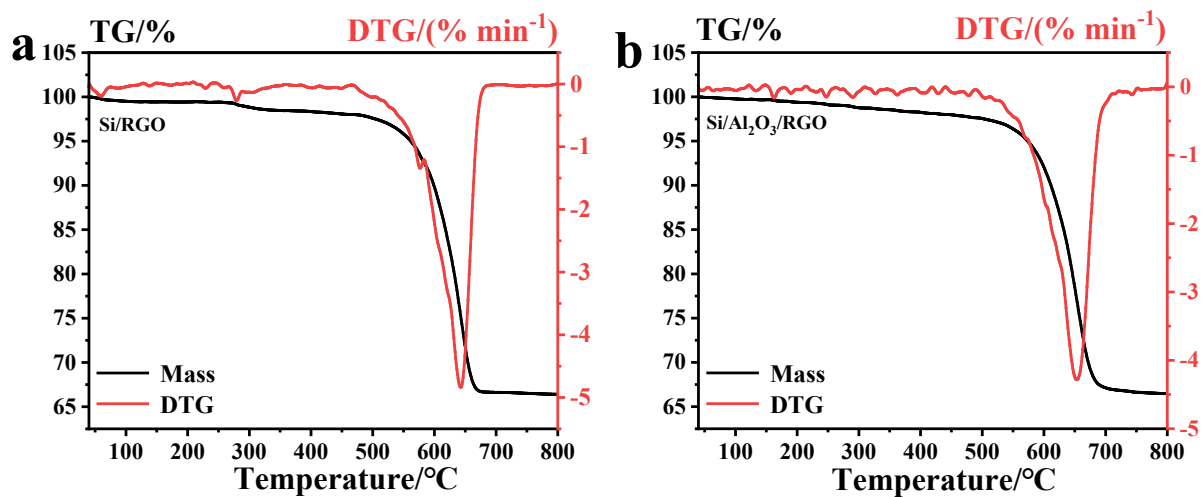

Figure S4 TGA curves of Si/RGO (a) and Si/Al<sub>2</sub>O<sub>3</sub>/RGO (b).

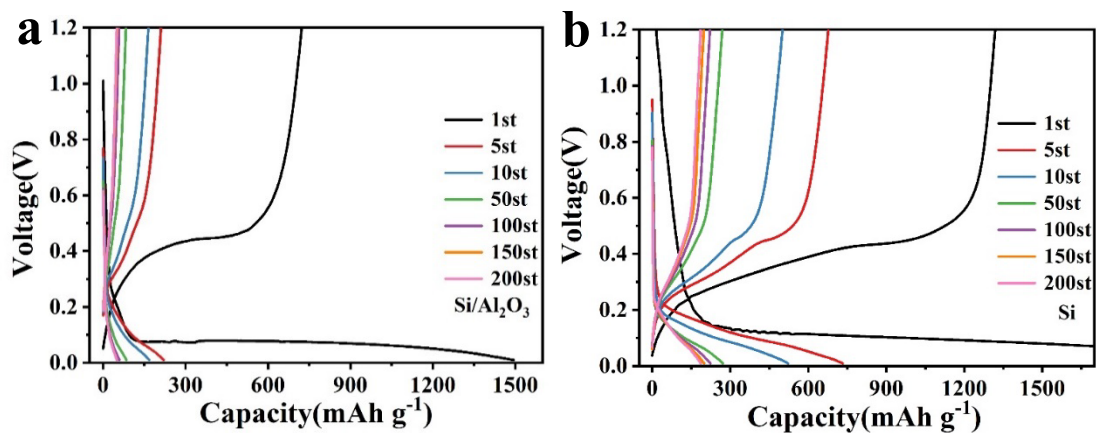

**Figure S5** Galvanostatic voltage-capacity curves of Si/Al<sub>2</sub>O<sub>3</sub> (a) and pure silicon (b) electrode materials at different cycle (1st, 5th, 10th, 50th, 100th, 150th and 200th cycles).

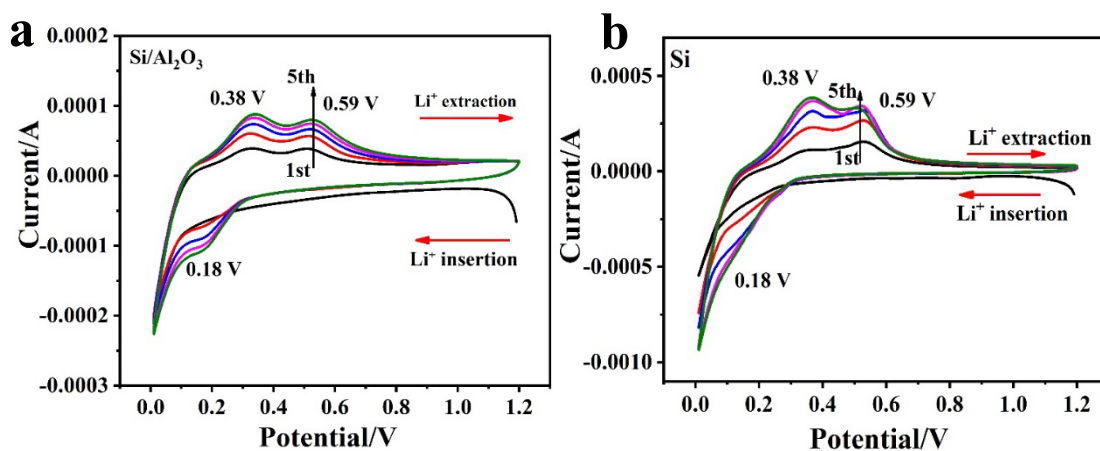

**Figure S6** Cyclic voltammograms of the Si/Al<sub>2</sub>O<sub>3</sub> electrode (a) and pure Si electrode (b).
